# Supplementary material for: Insights into body size variation in cetaceans from the evolution of body-size-related genes
Source: PubMed Central journal article supplement (PMC6660953; doi:10.1186/s12862-019-1461-9), 2019-07-27

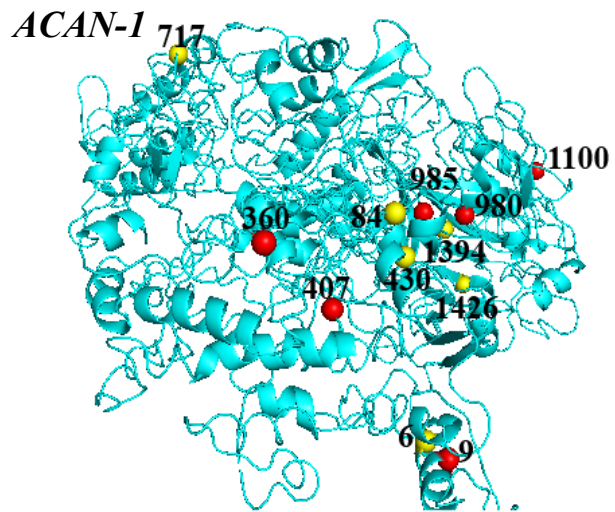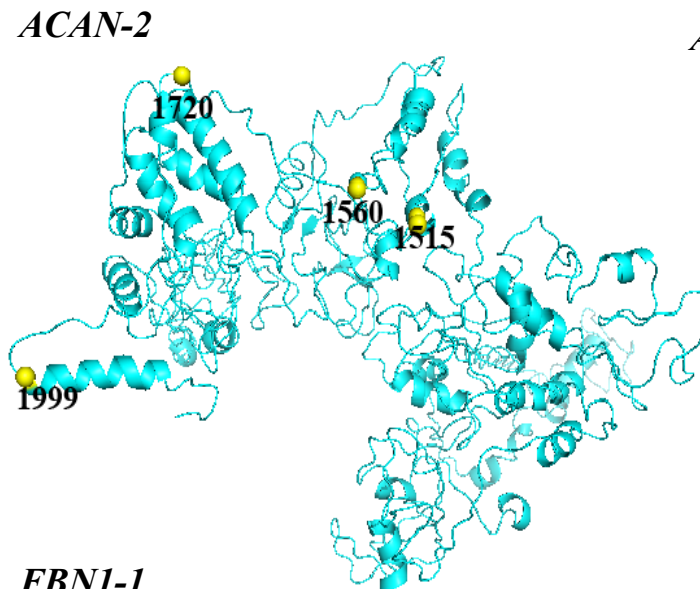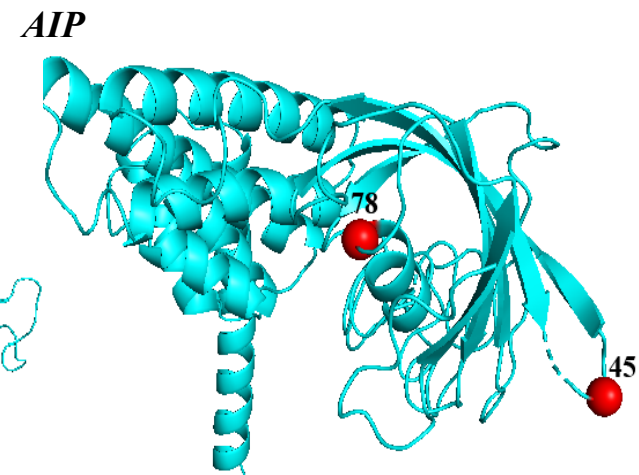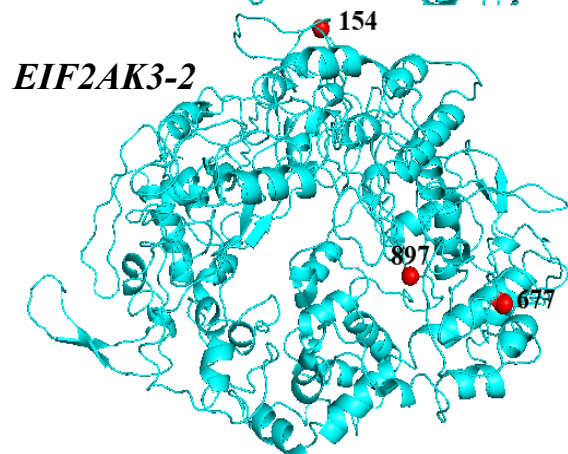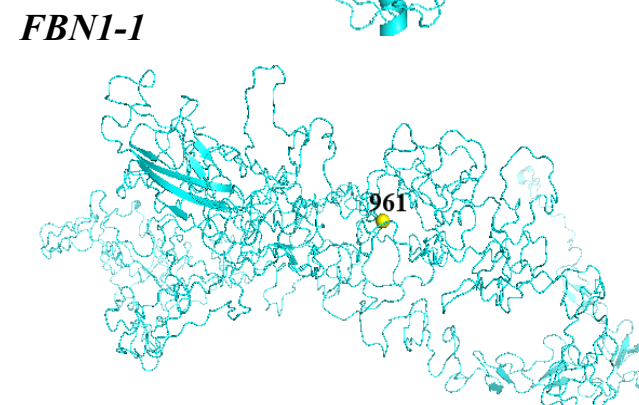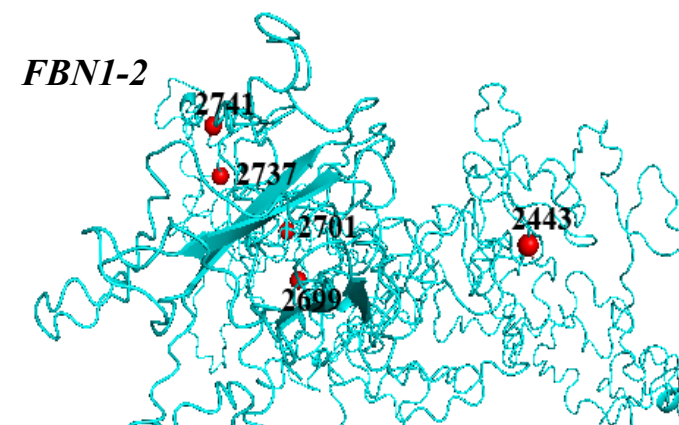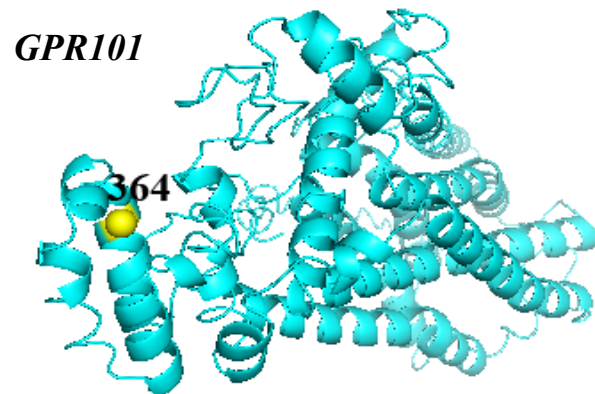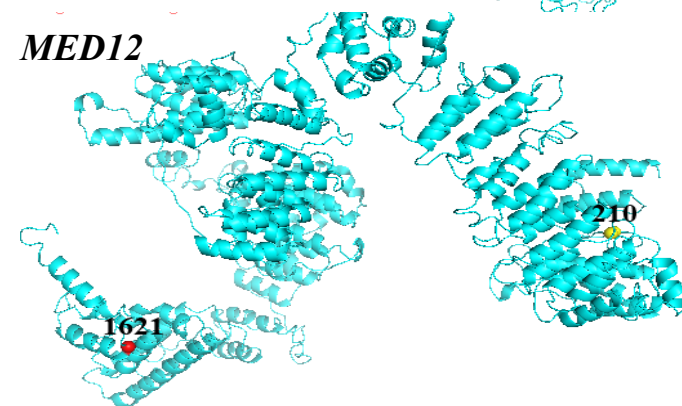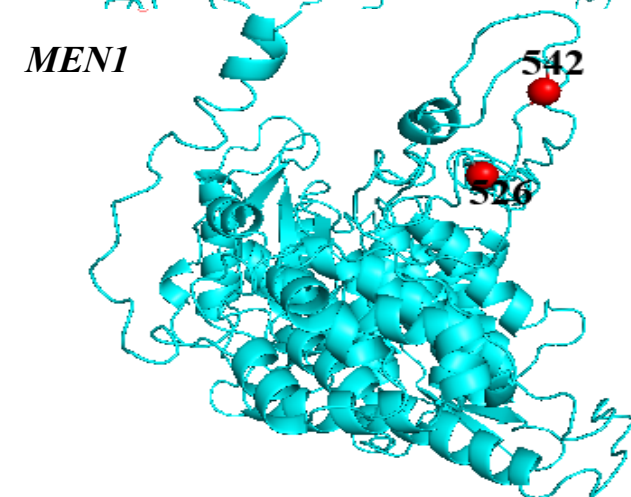

*NPR2*

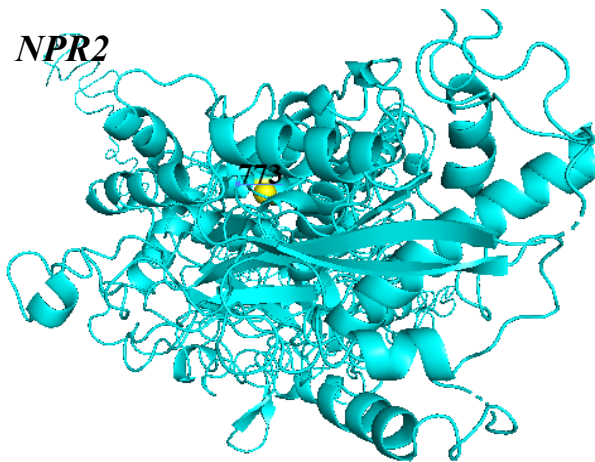

*NSD1-1*

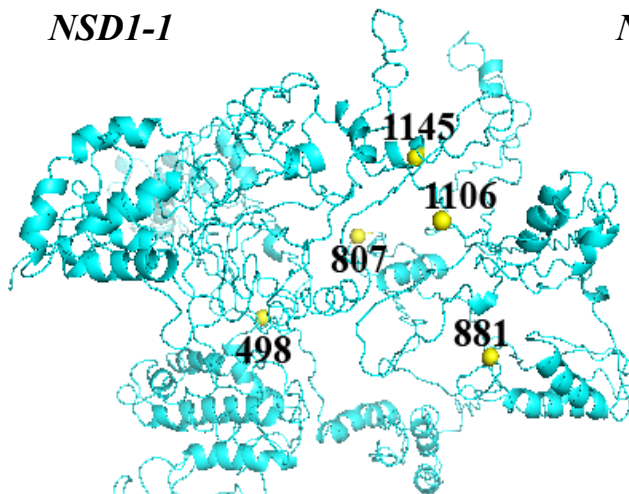

*NSD1-2*

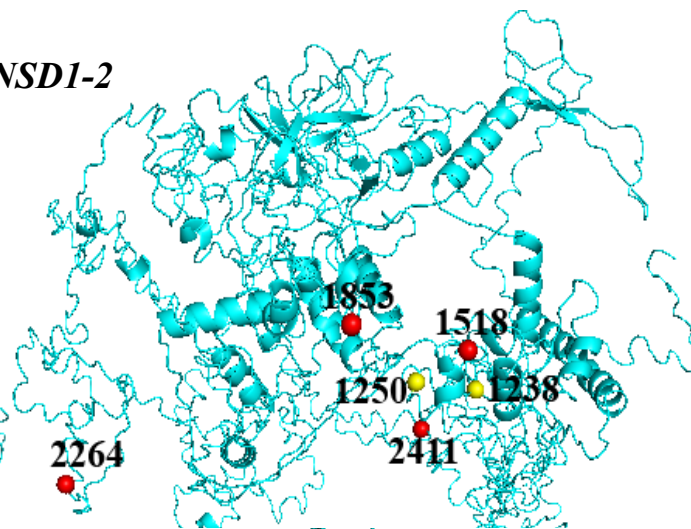

*OBSL1*

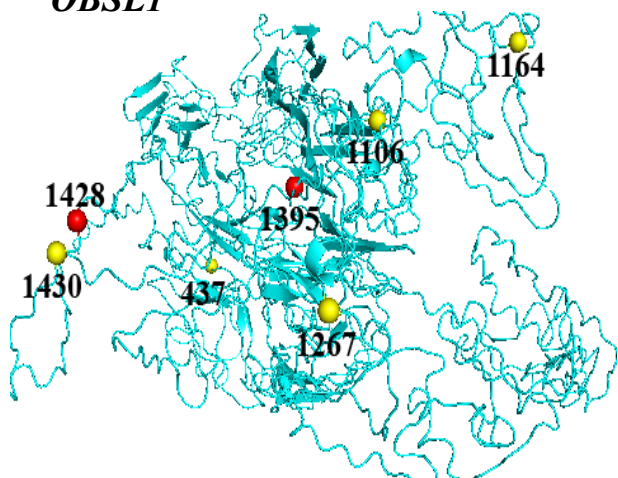

*PLOD1*

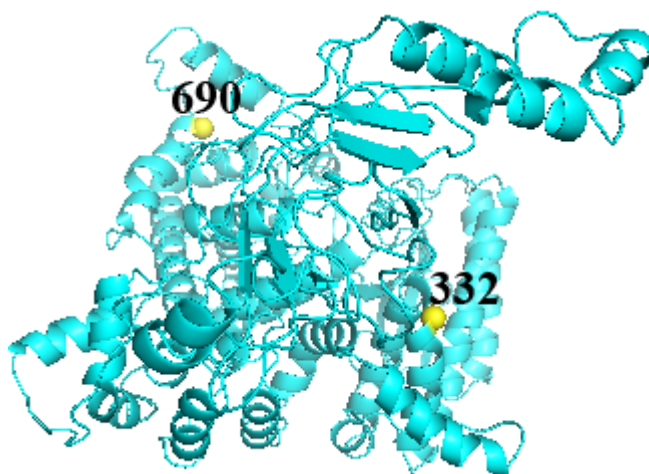

*PLAG1*

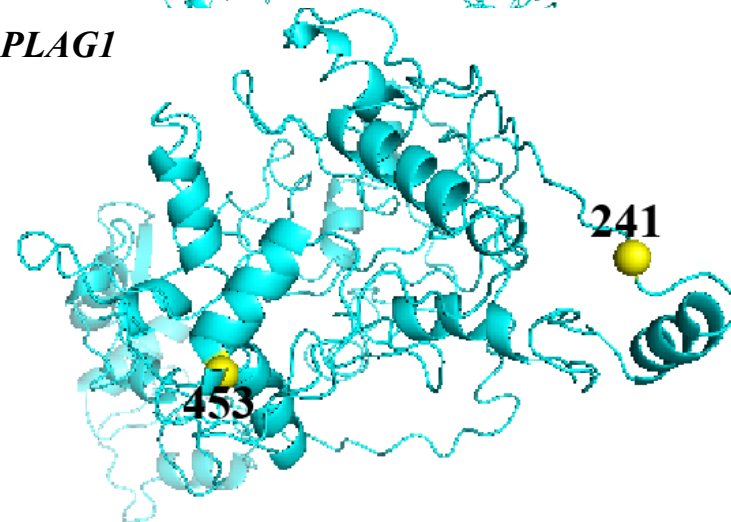

*PIT-1*

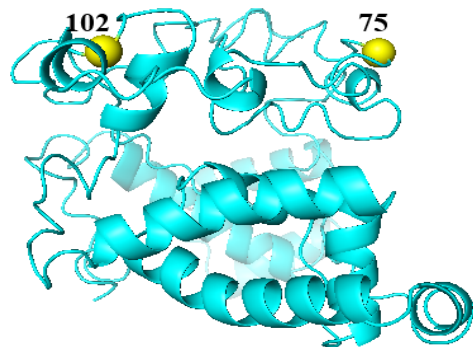

Supplement: 12862_2019_1461_MOESM2_ESM.pdf [file 12862_2019_1461_MOESM2_ESM.pdf]
